# Supplementary material for: Exploring the Phenotype and Possible Mechanisms of Palinopsia in Visual Snow Syndrome
Source: PubMed Central journal article supplement — Invest Ophthalmol Vis Sci. 2024 Oct 16;65(12):23. doi: 10.1167/iovs.65.12.23 (PMC11488523; doi:10.1167/iovs.65.12.23), 2024-10-16
Supplement: iovs-65-12-23_s001.pdf [file iovs-65-12-23_s001.pdf]

**Supplementary Figure 1: Palinopsia questionnaire - Part A (Persistent afterimages).** Questions used to screen for persistent afterimages of stationary objects or scenes (Q1) and, if present, collect a detailed description (Q2-Q16).

| <b>A. Afterimages of stationary objects of scenes</b>                                                                                                                                                                                                                                                                                                                                                                                                                                                                                           |
|-------------------------------------------------------------------------------------------------------------------------------------------------------------------------------------------------------------------------------------------------------------------------------------------------------------------------------------------------------------------------------------------------------------------------------------------------------------------------------------------------------------------------------------------------|
| <b>These questions are about objects or scenes and not bright lights</b>                                                                                                                                                                                                                                                                                                                                                                                                                                                                        |
| <b>1. Have you ever seen the image of an object or scene after it was removed, or you looked away or closed your eyes?</b><br><input type="checkbox"/> yes <input type="checkbox"/> no<br><b>If yes, proceed to the next question. If no, proceed to section B on the next page</b>                                                                                                                                                                                                                                                             |
| <b>2. Of which objects or scenes have you seen images? Tick all that apply.</b><br><input type="checkbox"/> images on the screens of electronic devices (e.g., computer, TV, phone, tablet)<br><input type="checkbox"/> objects or scenes that stand out strongly from their background<br><input type="checkbox"/> objects or scenes that don't stand out strongly from their background                                                                                                                                                       |
| <b>3. How bright are the objects or scenes of which you have seen images? Tick all that apply.</b><br><input type="checkbox"/> brighter than their background <input type="checkbox"/> darker than their background                                                                                                                                                                                                                                                                                                                             |
| <b>4. Give some examples of objects or scenes of which you have seen images.</b>                                                                                                                                                                                                                                                                                                                                                                                                                                                                |
| <b>5. When the original object disappears or you look away, when does the image typically appear?</b><br><input type="checkbox"/> immediately <input type="checkbox"/> after a delay of minutes <input type="checkbox"/> after a delay of hours                                                                                                                                                                                                                                                                                                 |
| <b>6. Where in your vision do the images of objects or scenes occur?</b><br><input type="checkbox"/> in the same location as the original object or scene, or moves with the eyes when you look around (e.g., if the object is in the centre of your vision, then the image is in the centre of your vision and stays in the centre if you move your eyes)<br><input type="checkbox"/> in a different location to the original object or scene (e.g., if the object is in the centre of your vision, the image appears in a different location) |
| <b>7. Typically, what colour are the images of objects or scenes?</b><br><input type="checkbox"/> same colours as the original object or scene<br><input type="checkbox"/> initially the same colours as the object or scene, but fades to different colours over time<br><input type="checkbox"/> different colours to the object or scene<br><input type="checkbox"/> black, regardless of the colour of the object or scene<br><input type="checkbox"/> translucent                                                                          |
| <b>8. Which best describes the appearance of the images of objects or scenes?</b><br><input type="checkbox"/> A realistic image, as clear and detailed as the original object or scene<br><input type="checkbox"/> An indistinct image that is faded and/or less detailed<br><input type="checkbox"/> A distinct image, detailed but not as clear and realistic as the original object or scene                                                                                                                                                 |
| <b>9. In your own words, describe what the images of objects or scenes typically look like.</b>                                                                                                                                                                                                                                                                                                                                                                                                                                                 |
| <b>10. When you see an image of an object or scene, how long does it typically last?</b><br><input type="checkbox"/> less than a second <input type="checkbox"/> 15 seconds or more <input type="checkbox"/> hours<br><input type="checkbox"/> 1 to 14 seconds <input type="checkbox"/> minutes <input type="checkbox"/> days                                                                                                                                                                                                                   |
| <b>11. How often do you see images of objects or scenes? Complete the following sentence.</b><br><i>I typically see these images [ write a number ] _____ days per [select most appropriate] week / month / year</i>                                                                                                                                                                                                                                                                                                                            |
| <b>12. Do you see images of objects or scenes more than once in a day?</b><br><input type="checkbox"/> never <input type="checkbox"/> occasionally <input type="checkbox"/> more often                                                                                                                                                                                                                                                                                                                                                          |
| <b>13. Do you see images of objects or scenes before a headache?</b><br><input type="checkbox"/> never <input type="checkbox"/> sometimes <input type="checkbox"/> always                                                                                                                                                                                                                                                                                                                                                                       |
| <b>14. Do you see images of objects or scenes during a headache?</b><br><input type="checkbox"/> never <input type="checkbox"/> sometimes <input type="checkbox"/> always                                                                                                                                                                                                                                                                                                                                                                       |
| <b>15. Do you see images of objects or scenes after a headache?</b><br><input type="checkbox"/> never <input type="checkbox"/> sometimes <input type="checkbox"/> always                                                                                                                                                                                                                                                                                                                                                                        |
| <b>16. Describe a typical example of situation where you have noticed images of objects or scenes.</b>                                                                                                                                                                                                                                                                                                                                                                                                                                          |

**Supplementary Figure 2: Palinopsia questionnaire - Part B (Trailing).** Questions used to screen for afterimages trailing behind moving objects (Q1) and, if present, collect a detailed description (Q2-Q13)

| <b>B. Afterimages of moving objects</b>                                                                            |                                                                                                                                                                                                                                                                                                        |
|--------------------------------------------------------------------------------------------------------------------|--------------------------------------------------------------------------------------------------------------------------------------------------------------------------------------------------------------------------------------------------------------------------------------------------------|
| <b>These questions are about moving objects and not moving bright lights</b>                                       |                                                                                                                                                                                                                                                                                                        |
| <b>1. Do you ever see a series images trailing a moving object?</b>                                                | <input type="checkbox"/> yes <input type="checkbox"/> no                                                                                                                                                                                                                                               |
| <b>If yes, proceed to the next question. If no, you are not required to answer any more questions.</b>             |                                                                                                                                                                                                                                                                                                        |
| <b>2. Of which moving objects have you seen trailing images? Tick all that apply.</b>                              | <input type="checkbox"/> images on the screens of electronic devices (e.g., computer, TV, phone, tablet)<br><input type="checkbox"/> objects or scenes that stand out strongly from their background<br><input type="checkbox"/> objects or scenes that don't stand out strongly from their background |
| <b>3. How bright are the moving objects of which you have seen trailing images? Tick all that apply.</b>           | <input type="checkbox"/> brighter than their background <input type="checkbox"/> darker than their background                                                                                                                                                                                          |
| <b>4. Give some examples of moving objects of which you have seen trailing images.</b>                             |                                                                                                                                                                                                                                                                                                        |
| <b>5. Which best describes the trailing images?</b>                                                                | <input type="checkbox"/> a series of separated images in the trail of the moving object<br><input type="checkbox"/> a series of images blurred together in the trail of a moving object                                                                                                                |
| <b>6. Which best describes the appearance of the trailing images?</b>                                              | <input type="checkbox"/> same colour and brightness as the moving object<br><input type="checkbox"/> same colour as the moving object but less bright                                                                                                                                                  |
| <b>7. In your own words, describe what the trailing images of moving objects typically look like.</b>              |                                                                                                                                                                                                                                                                                                        |
| <b>8. How often do you see trailing images of moving objects? Complete the following sentence.</b>                 | <i>I typically see these images [a number] _____ days per [select most appropriate] week / month / year</i>                                                                                                                                                                                            |
| <b>9. Do you see trailing images of moving objects more than once in a day?</b>                                    | <input type="checkbox"/> never <input type="checkbox"/> occasionally <input type="checkbox"/> more often                                                                                                                                                                                               |
| <b>10. Do you see trailing images of moving objects before a headache?</b>                                         | <input type="checkbox"/> never <input type="checkbox"/> sometimes <input type="checkbox"/> always                                                                                                                                                                                                      |
| <b>11. Do you see trailing images of moving objects during a headache?</b>                                         | <input type="checkbox"/> never <input type="checkbox"/> sometimes <input type="checkbox"/> always                                                                                                                                                                                                      |
| <b>12. Do you see trailing images of moving objects after a headache?</b>                                          | <input type="checkbox"/> never <input type="checkbox"/> sometimes <input type="checkbox"/> always                                                                                                                                                                                                      |
| <b>13. Describe a typical example of a situation where you have noticed trailing images after a moving object.</b> |                                                                                                                                                                                                                                                                                                        |

**Supplementary Table 1:** Neuroactive medication taken by subset of participants with VSS

| <b>Neuroactive medication</b>        | <b>Participant count</b> |
|--------------------------------------|--------------------------|
| escitalopram                         | 4                        |
| venlafaxine                          | 3                        |
| desvenlafaxine                       | 1                        |
| gabapentin                           | 1                        |
| methylphenidate                      | 1                        |
| methylphenidate and sodium valproate | 1                        |

**Supplementary Table 2: Afterimage characteristics in VSS**

| id | group        | object examples                                                                                                                      | afterimage colour          | image type | afterimage description                                                                                                                                                             | duration     | frequency          | situations                                                                                                                       |
|----|--------------|--------------------------------------------------------------------------------------------------------------------------------------|----------------------------|------------|------------------------------------------------------------------------------------------------------------------------------------------------------------------------------------|--------------|--------------------|----------------------------------------------------------------------------------------------------------------------------------|
| 1  | VSS          | cars                                                                                                                                 | same colour                | distinct   | afterimage translucent                                                                                                                                                             | <1 s         | once a month       | moving head while looking at car                                                                                                 |
| 2  | VSS          | looking away from the tv or computer screen, movies that have a bright background and a dark object, looking at my phone in the dark | same colour                | indistinct | if I see a person, I will see a silhouette of the person, objects stay the same shape, after a while it slowly fades away                                                          | 1-14 s       | twice a week       | watching a bright video in a dark room                                                                                           |
| 3  | VSS          | removing my water bottle from the nightstand to drink, after image against wall; green crossing sign after it returns to red         | fades to different colours | indistinct | blurry, flat, floating, light-filled; kind of like a misty light through cellophane, caught on the surface of my eye                                                               | minutes      | daily              | while laying down still on my bed if I look around and focus on a new scene then move my eyes the scene will follow              |
| 4  | VSS          | screens, furniture, cars                                                                                                             | fades to different colours | distinct   | typically they start out lighter than the original object but with the same amount of detail. After they fade they lose detail, become darker and change colour.                   | 1-14 s       | fives times a week | During the afternoon, there is a chair that catches the sunlight in my room in such a way that it shines brightly                |
| 5  | VSS          | bookshelf (dark against white wall), stove (light against dark), lots of screens, trees                                              | different colour           | indistinct | usually shadows, frequently with a bruised purple colour, sometimes white/turquoise                                                                                                | 1-14 s       | daily              | all the time-random?                                                                                                             |
| 6  | VSS          | black text on white or contrasting background (screens, paper), buildings and trees, people                                          | different colour           | distinct   | mainly appear to be a negative of what the original object was. Just as detailed/clear as the initial object or scene but fades eventually                                         | 1-14 s       | daily              | looking at an object or scene that is reflecting daylight outside. An example could be looking at a person during a conversation |
| 7  | VSS          | prolonged viewing of an object or person                                                                                             | black                      | indistinct | akin to shadows of the original. Not defined, instead more general/fluid                                                                                                           | 15 s or more | daily              | having a conversation with another person or reading or straining my eyes, especially in cases of distinction between light/dark |
| 8  | VSS          | signs on tram stops, trees, tv scenes of people talking                                                                              | black                      | indistinct | sort of like shadows, like a jumbled collection of mostly dark coloured debris forming itself into the shape of what I saw, like how I'd imagine the flip side if the world was 2D | 1-14 s       | fives times a week | just walking down the street, there will be a lot of stimuli and lots of it will seem to imprint and overlap                     |
| 9  | VSS          | words on laptop, traffic lights                                                                                                      | black                      | distinct   | dark coloured, same shape as the original object or scene, not very distinct, more fuzzy                                                                                           | 1-14 s       | four times a week  | Anytime I look at the screen of my laptop                                                                                        |
| 10 | VSS          | when object disappears on a monitor, e.g. last scene on a YouTube video; simple shapes, edges                                        | black                      | indistinct | like a shadow, usually only the outline of the object                                                                                                                              | <1 s         | three times a week | on a monitor, under bright light                                                                                                 |
| 11 | VSS          | phone screen, TV, windows                                                                                                            | translucent                | indistinct | faded copy of the bright and dark elements                                                                                                                                         | 1-14 s       | daily              | looking up from my computer at work                                                                                              |
| 12 | VSS          | outlines of trees against the sky visible when looking up; outlines of people when looking at them and then away from them           | translucent                | distinct   | white filled version-outline most clear-disappears always within 10 seconds (bright environment); dark filled version same as above (dark environment)                             | 1-14 s       | daily              | on bright sunny days; in a bright room with artificial lights and bright/white walls                                             |
| 13 | VSS migraine | people on the screen, pictures of flowers, logos on large signs                                                                      | same colour                | indistinct | a patch of colour (usually a bright solid colour) that is in the rough shape of the thing I was looking at                                                                         | 1-14 s       | twice a week       | If I'm looking at a bright screen, typically in the dark                                                                         |

| id | group        | object examples                                                                                                                       | colour                     | type       | afterimage description                                                                                                                                                                                                                                                                         | duration     | frequency           | situations                                                                                                                                                        |
|----|--------------|---------------------------------------------------------------------------------------------------------------------------------------|----------------------------|------------|------------------------------------------------------------------------------------------------------------------------------------------------------------------------------------------------------------------------------------------------------------------------------------------------|--------------|---------------------|-------------------------------------------------------------------------------------------------------------------------------------------------------------------|
| 14 | VSS migraine | lamps, cups, movies and shows during a scene change                                                                                   | fades to different colours | distinct   | same shape but sometimes different colours/opposite, stays right in centre and moves with my eye                                                                                                                                                                                               | 15 s or more | daily               | usually when on my phone, watching TV, riding in car. Usually when I am relaxed and looking at something for a while                                              |
| 15 | VSS migraine | trees, buildings                                                                                                                      | different colour           | indistinct | like a shape or silhouette of the object that sort of seems/feels like a photo negative                                                                                                                                                                                                        | 1-14 s       | daily               | usually where things are well lit and have a strong contrast to their background e.g., outside on a sunny day, an illuminated object against a dark background    |
| 16 | VSS migraine | desk, my hand, pen, walls                                                                                                             | different colour           | indistinct | either pink green or both; like a silhouette, low detail, colour intensity varies                                                                                                                                                                                                              | 1-14 s       | daily               | day to day life; in white or well-lit rooms especially                                                                                                            |
| 17 | VSS migraine | people, this document,                                                                                                                | different colour           | indistinct | faded memories of the object, shadowy and indistinct, it is more the outline of the object, sometimes different faded and translucent colours                                                                                                                                                  | 1-14 s       | daily               | after looking at someone or something that is against a stark background                                                                                          |
| 18 | VSS migraine | people, features on walls, reflections on cars                                                                                        | different colour           | indistinct | often an inverse of the object (colour-wise), varying clarity depending on how contrasted the object is to the background or how long I've been looking at it- the object shape will be the same but if I'm looking for a while, the inside shape will have more detail (e.g. facial features) | 1-14 s       | daily               | often when I've been looking in the same place for a while -in conversations where I'm across from someone, in meetings                                           |
| 19 | VSS migraine | TV/computer (i.e. lit background), fences, windows and frames, lights, trees against bright backgrounds, striped/shaped images        | different colour           | distinct   | clear silhouette and sometimes more detail, usually dark on lighter backgrounds but can be light on darker background or "opposite" colour                                                                                                                                                     | minutes      | daily               | brightly lit areas                                                                                                                                                |
| 20 | VSS migraine | phone, paintings/vivid patterns, big bright shapes, traffic lights                                                                    | different colour           | distinct   | It looks like a solid shape (not detailed outline) but usually a solid colour, not necessarily the original colour                                                                                                                                                                             | 1-14 s       | three times a week  | after a headache/migraine or very tired (2+ nights of poor sleep) usually afternoon/evening and if I have looked at close up objects e.g., phone/computer/reading |
| 21 | VSS migraine | writing on books or screens, anything against a bright sky                                                                            | different colour           | distinct   | usually brightly coloured (blue, green, turquoise) silhouette of object                                                                                                                                                                                                                        | 1-14 s       | twice a month       | often I have a headache but not always. Usually in bright light                                                                                                   |
| 22 | VSS migraine | images on screens, people, random objects like chair or cup or ceiling fan, road lines                                                | different colour           | indistinct | fuzzy outlines or blobs in the shape of the object, bright white or blue or green in colour                                                                                                                                                                                                    | 1-14 s       | twice a week        | occurs randomly when looking at everyday objects inside in normal lighting                                                                                        |
| 23 | VSS migraine | phone over a desk (phone not being on). White letters on a black background. People's clothes (i.e. stripes on shirts/black t-shirts) | translucent                | indistinct | for the first second or two, the image is clearer and looks like the colours are inverted, then it quickly turns into a translucent image that floats around, doesn't necessarily follow my eyes                                                                                               | minutes      | daily               | white backgrounds- when at home looking at walls and picture frames. Black backgrounds i.e., phone screen on battery saver mode                                   |
| 24 | VSS migraine | everyday objects, people in front of bright light                                                                                     | translucent                | distinct   | the object/person typically looks the same/similar but bright white or translucent. Often moves in visual field quickly.                                                                                                                                                                       | 1-14 s       | three times a month | occasionally associated with headache, more random than headache associated, more frequently when tired                                                           |
| 25 | VSS migraine | large pieces of furniture                                                                                                             | translucent                | indistinct | colourless shadow in the shape of the object                                                                                                                                                                                                                                                   | 1-14 s       | twice a year        | when I am very tired or stressed                                                                                                                                  |

**Supplementary Table 3: Trailing in VSS**

| id | group        | object examples                                                                                     | appearance              | detail                      | trailing description                                                                                                                | frequency          | situations                                                                                                                                  |
|----|--------------|-----------------------------------------------------------------------------------------------------|-------------------------|-----------------------------|-------------------------------------------------------------------------------------------------------------------------------------|--------------------|---------------------------------------------------------------------------------------------------------------------------------------------|
| 3  | VSS          | scrolling text on phone, people's limbs when walking, lamp posts on the tram, arms of people waving | images blurred together | same colour but less bright | 5-6 blurred copies of the object, slowly becoming more transparent the further they move                                            | daily              | light things against dark, like lampposts, people. It is stronger at night.                                                                 |
| 4  | VSS          | cars, people, balls                                                                                 | separated images        | same colour but less bright | they look like a series of screenshots of the image or like frames in an animation                                                  | once a week        | watching cars go by under certain light conditions                                                                                          |
| 5  | VSS          | poles, cars, sometimes birds or balls being thrown                                                  | separated images        | same colour but less bright | a blur effect as if times is stretching, distinct but overlapping                                                                   | three times a week | random                                                                                                                                      |
| 6  | VSS          | car driving across my vision                                                                        | images blurred together | same colour but less bright | typically the same as the initial object but less bright and slightly blurry                                                        | daily              | sitting at a traffic light watching the cars drive across my vision                                                                         |
| 7  | VSS          | in the case of distinct object/background I will very rarely notice them                            | images blurred together | same colour but less bright | similar to afterimages but more immediate and instead of moving my eyes for the trailing to occur it happens inherent to the object | 5 times per year   | car driving past                                                                                                                            |
| 12 | VSS          | people running, cars moving                                                                         | images blurred together | same colour but less bright | blurred, translucent vague shape, not clear outlines and does not contain fine details or textures                                  | daily              | person running fast, objects moving fast                                                                                                    |
| 14 | VSS migraine | my hand, anything moving side to side in front of me                                                | separated images        | same colour but less bright | like a flip book or stop motion, less intense than the original object                                                              | daily              | my hand, people walking by                                                                                                                  |
| 15 | VSS migraine | things moving on a screen                                                                           | images blurred together | same colour but less bright | kind of like a smear effect behind the object                                                                                       | once a month       | usually things moving on a screen                                                                                                           |
| 16 | VSS migraine | trains, trams                                                                                       | separated images        | same colour and brightness  | distinct from each other trailing versions of themselves                                                                            | daily              | well-lit white rooms it tends to be more noticeable, generally the more stressed I am the more I notice                                     |
| 17 | VSS migraine | my hands, anything that I move in my hands like a pen                                               | images blurred together | same colour but less bright | blurred continuation of the image or object                                                                                         | daily              | my hands, it is more noticeable when it is moving faster                                                                                    |
| 18 | VSS migraine | cars, my own hands                                                                                  | images blurred together | same colour but less bright | looks like a blur or like someone's added an effect to a movie                                                                      | twice a week       | usually when I've just woken up, looking out my window and seeing cars drive past                                                           |
| 19 | VSS migraine | usually lights where light seems to follow my eye movement e.g. lights on a car, torches            | images blurred together | same colour and brightness  | starts as bright as the original object and then fades                                                                              | once a week        | usually lit objects e.g. cars but after the car has gone, occasionally screen-based images                                                  |
| 20 | VSS migraine | arm/fingers (close up objects e.g. not cars)                                                        | images blurred together | same colour but less bright | the moving object is moving like a slow movie, smooth and not disjointed                                                            | twice a month      | after a migraine/poor sleep for 2+ nights, darker environment                                                                               |
| 23 | VSS migraine | hands moving                                                                                        | images blurred together | same colour but less bright | it looks like a slow-motion movie, as if the image is trying to catch up to the object, it is blurry and faded                      | daily              | if the moving object is close to my eyes i.e. my hands or someone gesticulating in front of me during a conversation (their arms and hands) |

**Supplementary Figure 3: Characteristics of persistent afterimages in migraine. (A-F)** For each question, the number of individuals selecting each response option is shown for the participants with migraine alone who reported persistent afterimages (n=5). Questions and responses are abbreviated (see Supplementary Fig. 1 for full text).

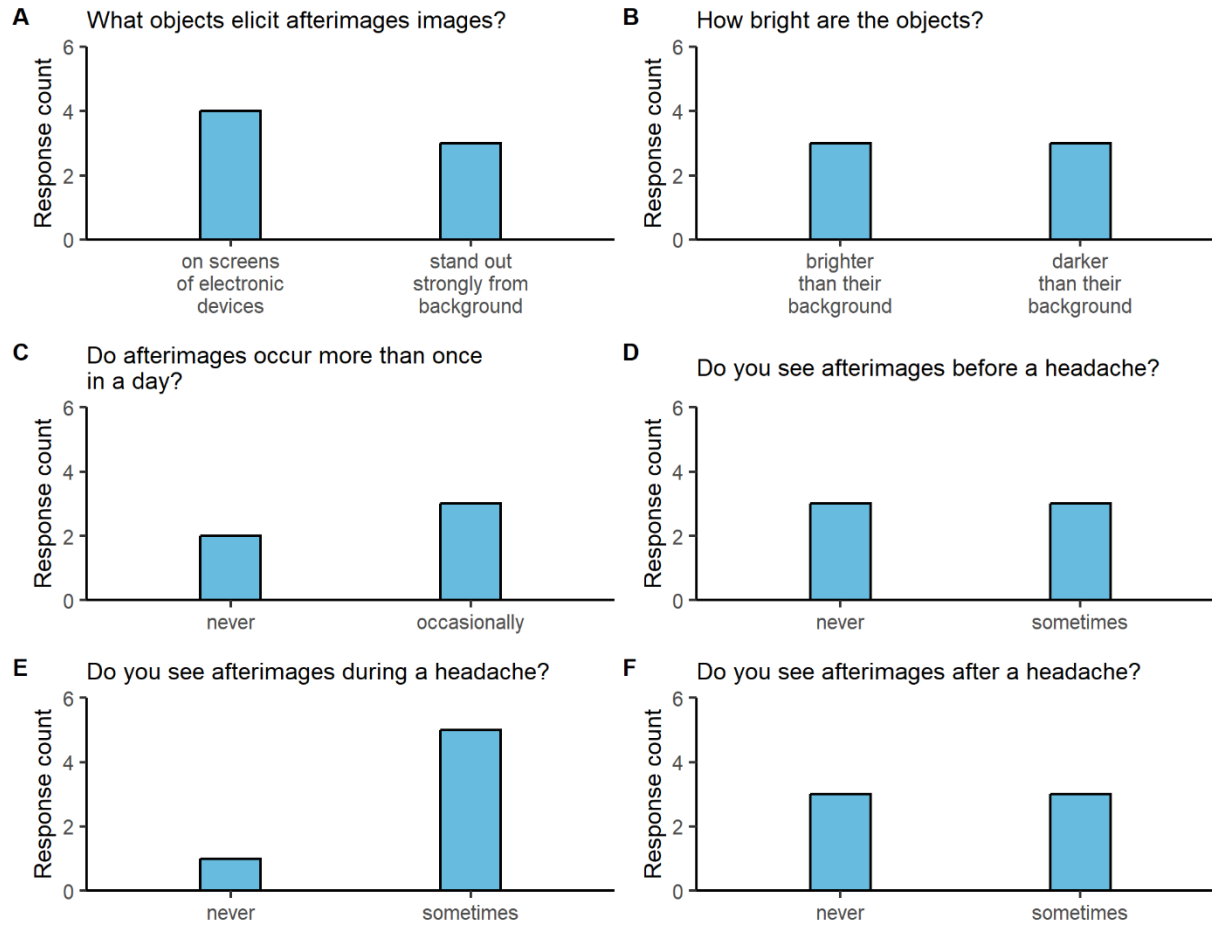

**Supplementary Table 4:** Afterimage characteristics in participants with migraine alone

| <b>id</b> | <b>delay</b> | <b>object examples</b>                                                                                           | <b>afterimage colour</b>   | <b>image type</b> | <b>afterimage description</b>                                                                            | <b>duration</b> | <b>frequency</b>    | <b>situations</b>                                                                                  |
|-----------|--------------|------------------------------------------------------------------------------------------------------------------|----------------------------|-------------------|----------------------------------------------------------------------------------------------------------|-----------------|---------------------|----------------------------------------------------------------------------------------------------|
| 1         | immediate    | computer screen images, words                                                                                    | fades to different colours | indistinct        | at first they are really clear and then they fade                                                        | 1-14 s          | five times a month  | after studying for a long time, for hours                                                          |
| 2         | immediate    | images with distinct outlines or shapes e.g. black star clipart on white phone screen                            | fades to different colours | indistinct        | faded almost as if the colours have been bleached by sunlight over time (but relatively bright at first) | 1-14 s          | three times a week  | after reading white text on black phone screen of average font size in dark (non-reading) mode     |
| 3         | immediate    | numbers on testing room wall                                                                                     | different colour           | distinct          | reverse colours, dull intensity but bright colours                                                       | 1-14 s          | twice a month       | when I've looked at something bright with contrasting colours                                      |
| 4         | immediate    | objects in the foreground of vision, so screens (but not images on screen), appliances i.e. microwave, lamps etc | black                      | indistinct        | it would be the outline of the object, all black but with white/gold border that is bright               | 1-14 s          | twice a week        | tired, end of day looking at screen. When my vision is disturbed by a headache or in the aftermath |
| 5         | immediate    | shapes and faces of television programs on a screen, water bottle                                                | translucent                | indistinct        | shadow or only the main part of the object like a faded contrast image of the same colour                | <1 s            | three times a month | looking at an object that contrasts with the background for an extended period of time             |
